# Supplementary material for: Perpendicularly oriented 2D perovskite thin films prepared using the bar-coating method and DMSO additive
Source: Royal Society of Chemistry journal article supplement (doi:10.1039/d1cc00180a), 2021-01-01
Supplement: d1cc00180a1.pdf [file d1cc00180a1.pdf]

Electronic Supplementary Information

for

Perpendicularly oriented 2D perovskite thin films prepared using the bar-  
coating method and DMSO additive

Misato Akiyoshi<sup>a</sup>, Masahiro Yoshizawa-Fujita<sup>a</sup>, Yuko Takeoka<sup>\*a</sup>, and Masahiro  
Rikukawa<sup>a</sup>

<sup>a</sup> Faculty of Science and Engineering, Sophia University, 7-1 Kioi-cho, Chiyoda-ku,  
Tokyo 102-8554, Japan

## 1. Materials

Hydroiodic acid (HI), *N,N*-dimethylformamide (DMF), and *N,N*-dimethylsulfoxide (DMSO) were purchased from the FUJIFILM Wako Pure Chemical, Ltd. *N*-cyclohexyl-2-pyrrolidone (CHP) was obtained from the Tokyo Chemical Industry Co., Ltd.

## 2. Characterization

X-ray diffraction (XRD) patterns were obtained with an X-ray diffractometer (SmartLab, Rigaku), in conjunction with a Ni-filtered copper  $K\alpha$  target and operating at 45 kV and 200 mA. Scanning electron microscopy (SEM) images were obtained with an SU8000 instrument (HITACHI).

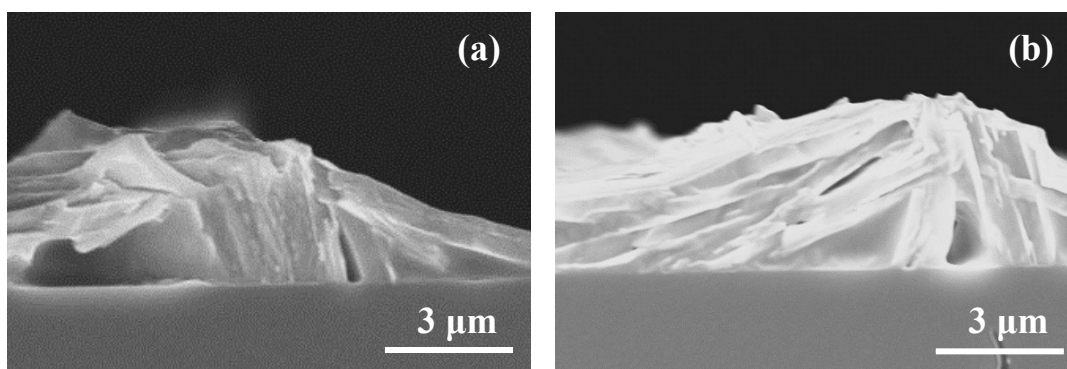

Figure S1. Cross-sectional SEM images of 7-AHA<sub>2</sub>PbI<sub>4</sub> films fabricated by bar-coating method with CHP, (a) Pb:CHP = 1:0.6, (b) 1:1.

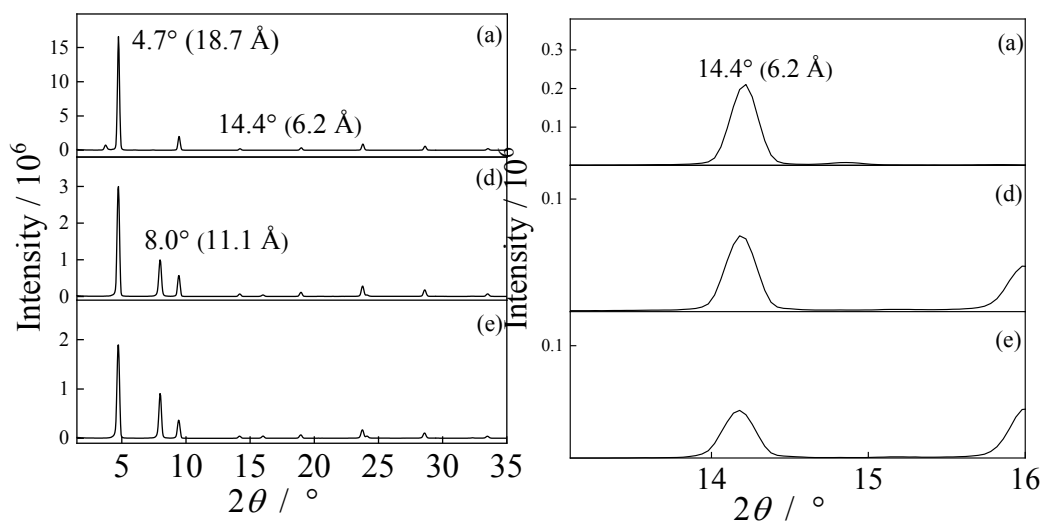

Figure S2. *Out-of-plane* XRD patterns of 7-AHA<sub>2</sub>PbI<sub>4</sub> films fabricated by the bar-coating method with DMSO, (a) Pb:DMSO = 1:0, (d) 1:0.6, and (e) 1:1.

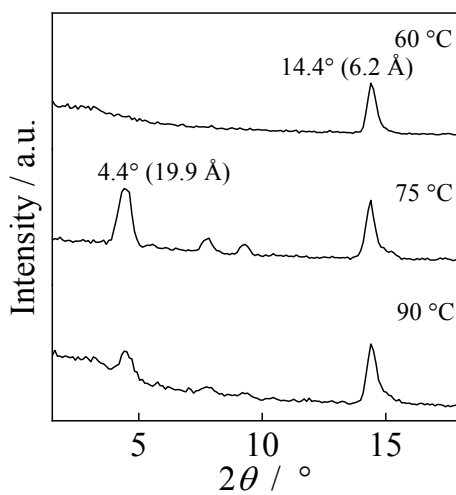

Figure S3. *In-plane* XRD patterns of 7-AHA<sub>2</sub>PbI<sub>4</sub> films for different pre-annealing temperatures: 60 °C, 75 °C, and 90 °C.

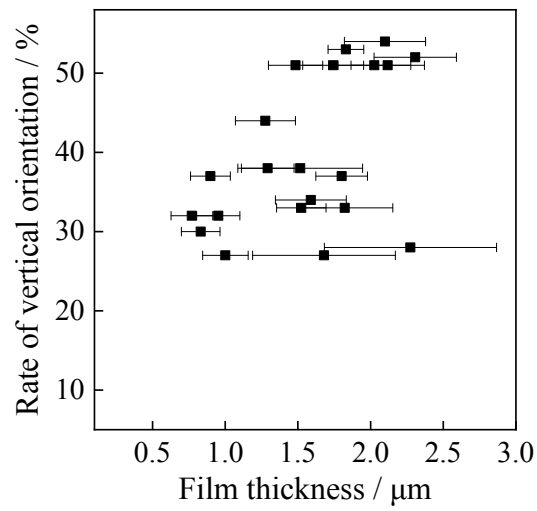

Figure S4. Correlation between film-thickness and the ratio of vertical orientation. ( $I_{hor}$ : Integrated intensity of horizontal orientation,  $I_{ver}$ : Integrated intensity of vertical orientation,  $W_{hor}$ : Integral width of horizontal orientation,  $W_{ver}$ : Integral width of vertical orientation)
